# Supplementary material for: Formation and stability of well-crystallized metastable octacalcium phosphate at high temperature by regulating the reaction environment with carbamide
Source: Royal Society of Chemistry journal article supplement (doi:10.1039/c9ce00677j), 2019-01-01
Supplement: c9ce00677j1.pdf [file c9ce00677j1.pdf]

## Supporting information

### Formation and stability of well-crystallized metastable octacalcium phosphate at high temperature by regulating the reaction environment with carbamide

Haishan Shi,<sup>abc</sup> Jing Zhang,<sup>d</sup> Xiaoling Ye,<sup>ab</sup> Tingting Wu,<sup>e</sup> Tao Yu<sup>c</sup> and Jiandong Ye<sup>\*ab</sup>

<sup>a</sup> National Engineering Research Center for Tissue Restoration and Reconstruction, South China University of Technology, 510006 Guangzhou, China. \*E-mail: jdye@scut.edu.cn.

<sup>b</sup> School of Materials Science and Engineering, South China University of Technology, 510640 Guangzhou, China.

<sup>c</sup> College of Chemistry and Materials Science, Jinan University, Guangzhou 510632, China.

<sup>d</sup> Centre for Oral Clinical & Translation Sciences, Faculty of Dentistry, Oral & Craniofacial Sciences, King's College London, London SE1 9RT, United Kingdom.

<sup>e</sup> The First Affiliated Hospital, Jinan University, 510632 Guangzhou, China.

Figure

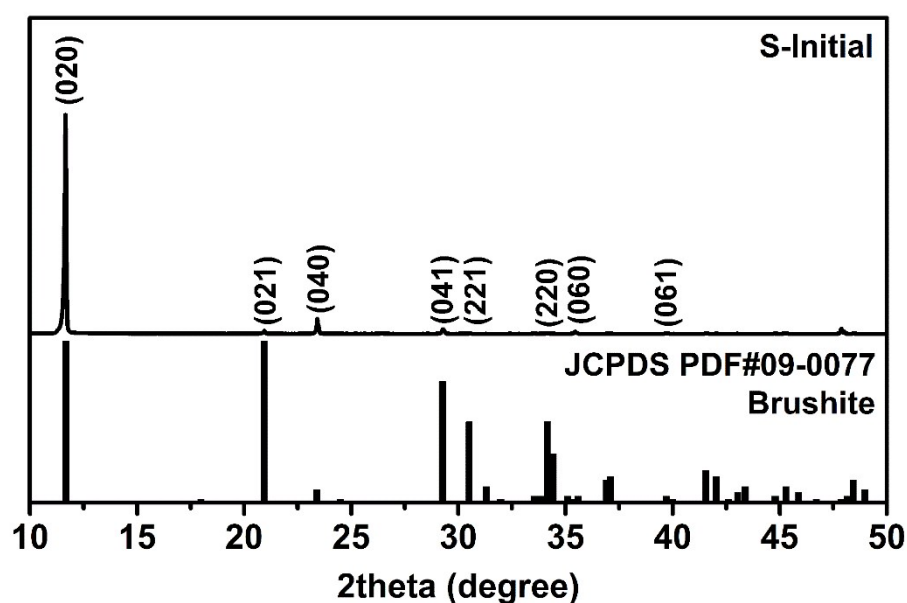

Fig. S1 XRD pattern of the sample obtained in the initial stage (10 min).
